# Supplementary material for: Ketoacid Analogues Supplementation in Chronic Kidney Disease and Future Perspectives
Source: MDPI journal article supplement (doi:10.3390/nu11092071), 2019-09-03
Supplement: s1 [file s1]

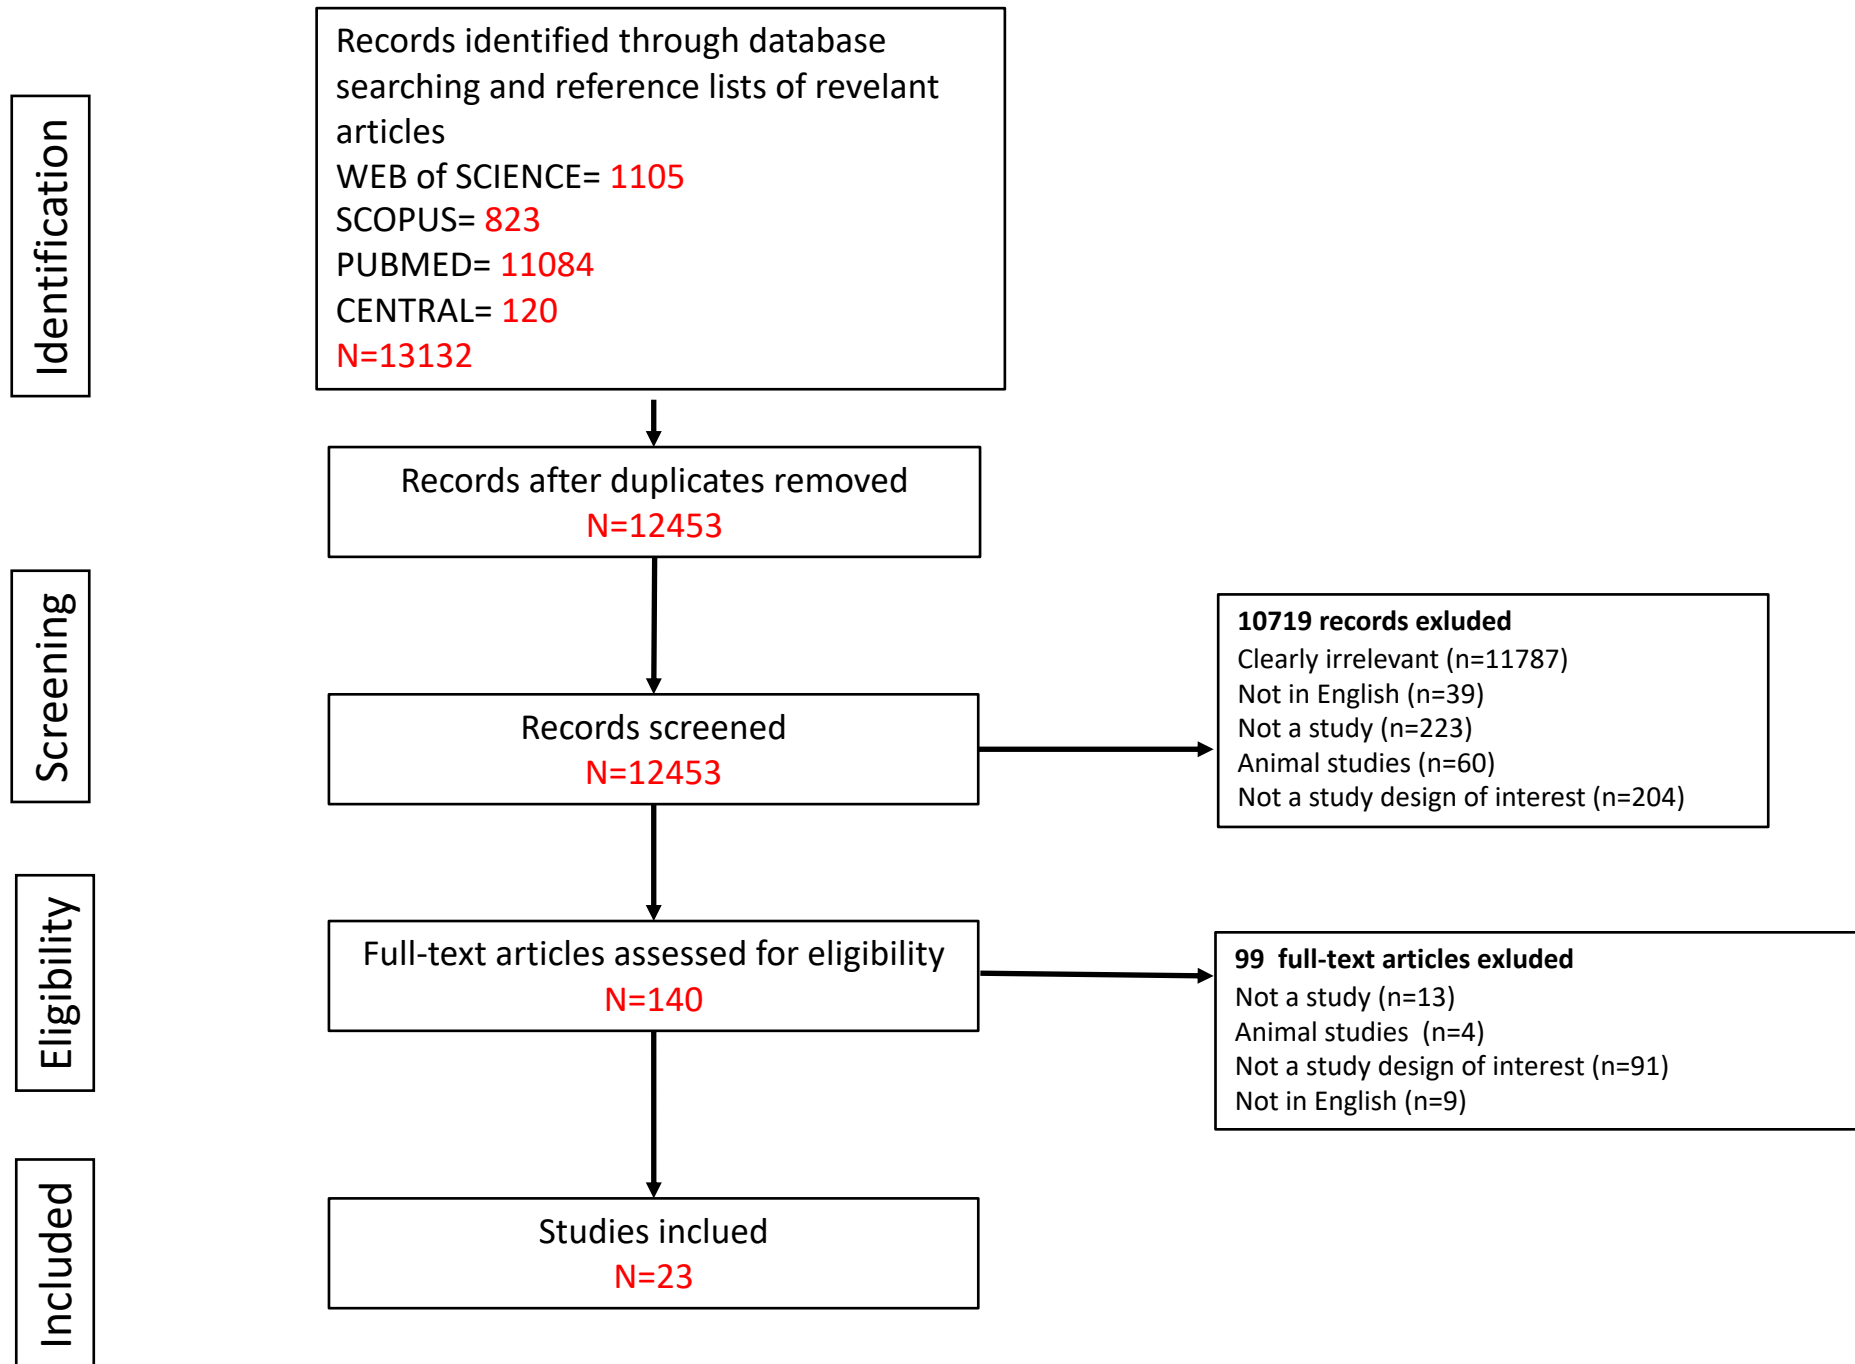

Figure S1. Identification process for randomized clinical studies.
